# Supplementary material for: Preparation condition optimization and stability of cubic phase CdS in photocatalytic hydrogen production
Source: Royal Society of Chemistry journal article supplement (doi:10.1039/d1nj00558h), 2021-01-01
Supplement: d1nj00558h1.pdf [file d1nj00558h1.pdf]

## Supplementary Information

### Preparation condition optimization and stability of cubic phase CdS in photocatalytic hydrogen production

Yixian Li, Mingcai Yin,\* Jiangfan Sun, Kaiyue Liang , Yaoting Fan and Zhongjun Li

Green Catalysis Center and College of Chemistry, Zhengzhou University, Zhengzhou 450001, China

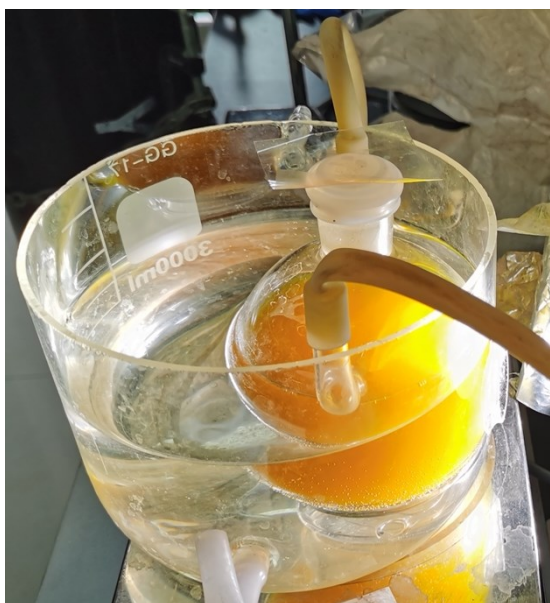

**Fig. S1** Picture of the reactor used in the hydrogen evolution experiments.

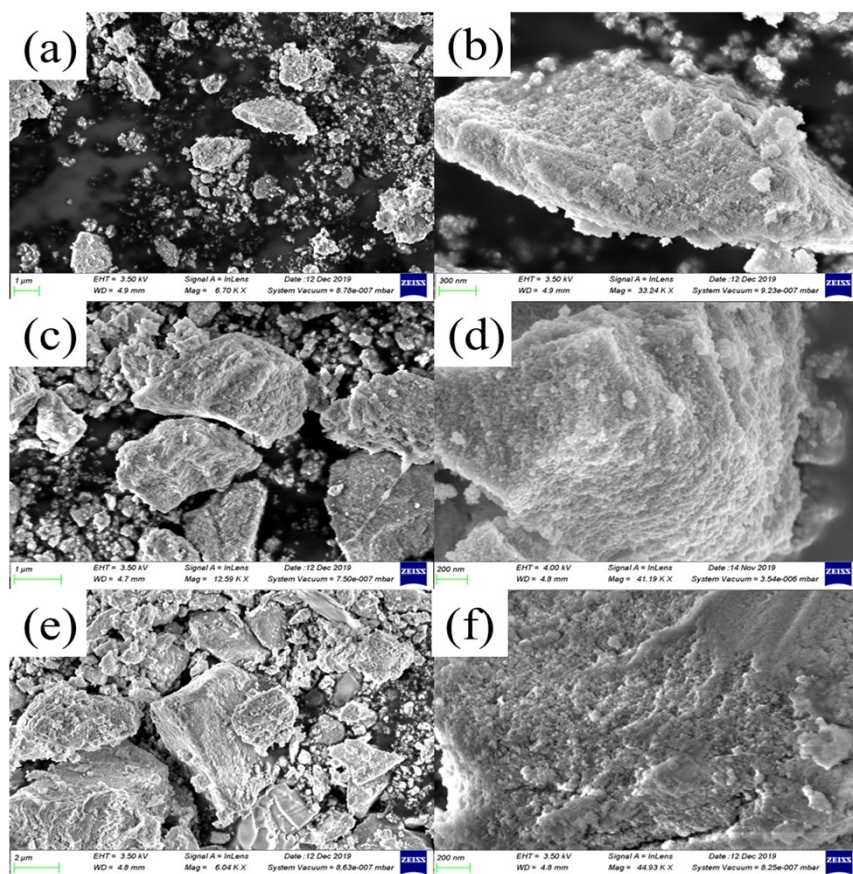

**Fig. S2** SEM images of samples CdS-8 (a, b), CdS-8-6 (c, d) and CdS-8-12 (e, f)

**Table S1** Atomic percent and the Cd to S molar ratios in different CdS samples

| Sample  | Cd (%) | S (%) | Cd : S |
|---------|--------|-------|--------|
| CdS-2   | 22.94  | 21.01 | 1.09   |
| CdS-8   | 24.77  | 28.44 | 0.87   |
| CdS-8-6 | 26.07  | 29.57 | 0.88   |

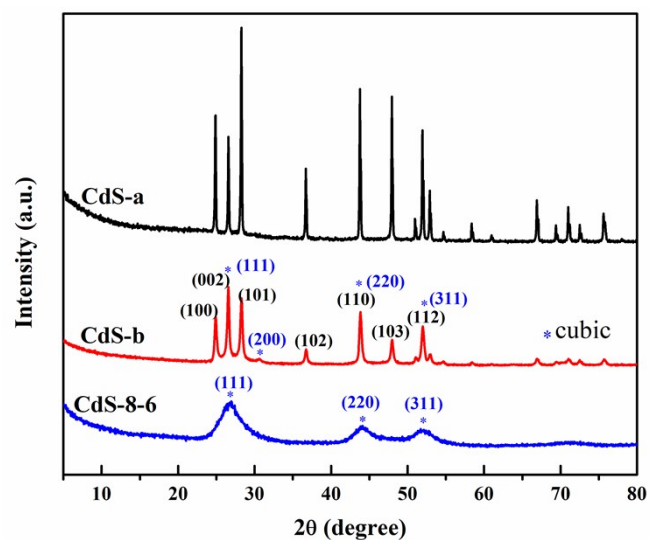

**Fig. S3** XRD patterns of CdS-a, CdS-b and CdS-8-6.

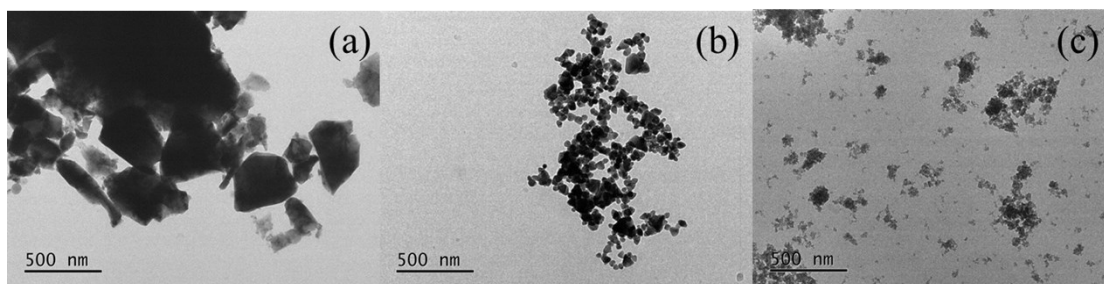

**Fig. S4** TEM images of CdS-a (a), CdS-b (b) and CdS-8-6 (c).

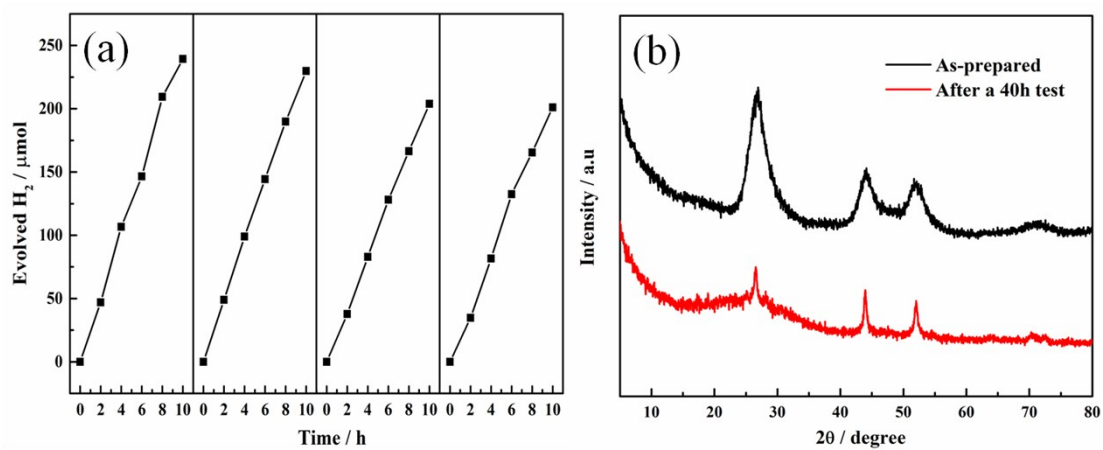

**Fig. S5** (a) Cyclic hydrogen production test over CdS-8-6, (b) XRD patterns of the CdS-8-6 samples as-prepared and recovered after 40 h.

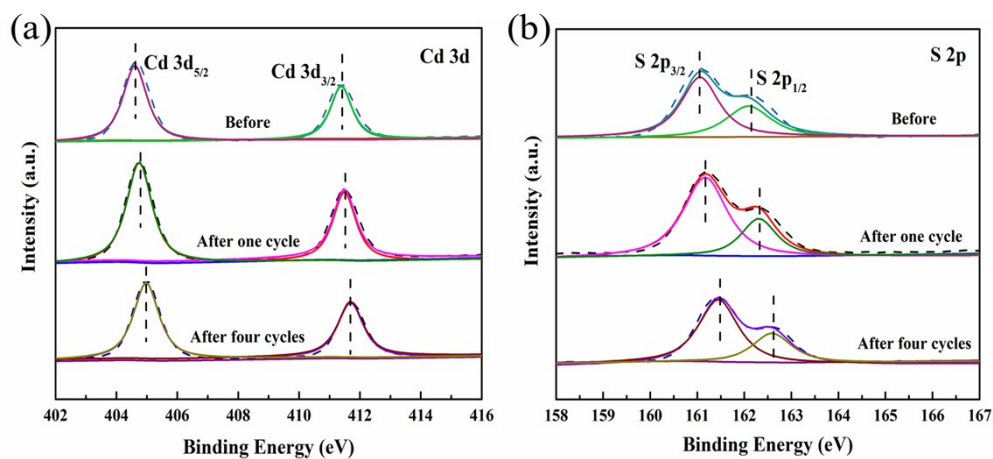

**Fig. S6** High-resolution Cd 3d and S 2p XPS spectra of the CdS-8-6 samples before and after H<sub>2</sub> evolution reaction.

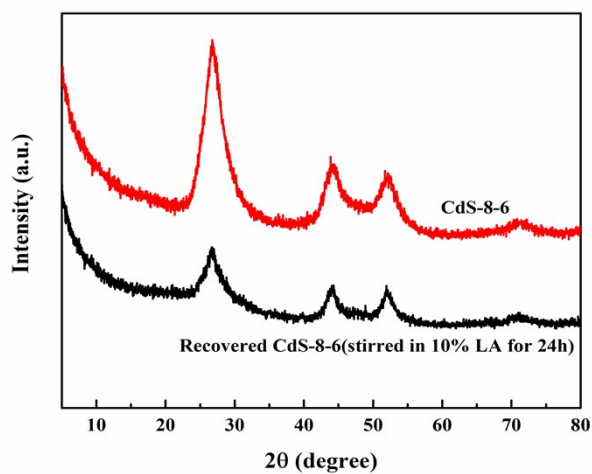

**Fig. S7** XRD patterns of the CdS-8-6 samples as-prepared and recovered after stirred in 10% LA for 24h.
